## **Telehealth during and beyond the COVID-19 Pandemic: Evidence from Licensed Dietitians in an Emerging Economy**

**Short title:** COVID-19 and Telenutrition in an Emerging Economy

**Keywords:** Telehealth, Telehealth Practical Guidelines, Dietitians, COVID-19, Lebanon.

**Abstract word count:** 300

**Text word count:** 4100

**Authors:** Maya Assaad, BS, LD <sup>1a</sup>, Nour Chamma, BS <sup>2</sup>, Miroslav Mateev, PhD <sup>1</sup>, Rana Rizk, PhD, MPH, MS, BS, LD <sup>2, 3b</sup>

### **Affiliation List:**

<sup>1</sup> Abu Dhabi School of Management, Abu Dhabi School, UAE; [assaadmaya@gmail.com](mailto:assaadmaya@gmail.com)  
(ORCID: <https://orcid.org/0009-0006-3655-3258>); [m.mateev@adsm.ac.ae](mailto:m.mateev@adsm.ac.ae)

<sup>2</sup> School of Arts and Sciences, Lebanese American University, Lebanon; [nour.chamma@lau.edu](mailto:nour.chamma@lau.edu);  
[rana.rizk01@lau.edu.lb](mailto:rana.rizk01@lau.edu.lb) (ORCID: <https://orcid.org/0000-0002-8850-6502>)

<sup>3</sup> INSPECT-LB (Institut National de Santé Publique, d'Épidémiologie Clinique et de Toxicologie-Liban), Lebanon.

---

<sup>a</sup> Lebanon

<sup>b</sup> Lebanon

**Authors' contributions:**

MA, MM, and RR conceptualized the study. MA, NC, and RR collected and analyzed the data. MA wrote the first draft with contributions from NC, MM, and RR. All authors reviewed and commented on subsequent drafts of the manuscript.

**Correspondent author:**

Maya Assaad, Abu Dhabi School of Management, Abu Dhabi School, UAE;  
[asssaadmaya@gmail.com](mailto:asssaadmaya@gmail.com)

**Funding/financial disclosure:** None

**Conflict of interest:** None

**Acknowledgments:** None

**Data Availability Statement:** Generated or analyzed Data of this study are included in the supplementary information files of this manuscript.

**Research Snapshot**

**Research questions:** Did Telehealth use by Lebanese Licensed Dietitians (LDs) change amid COVID-19? What tools, barriers, benefits, and perspectives were reported in the absence of practical guidelines?

**Key findings:** Telehealth use increased among surveyed 94 LDs from 48.4% before COVID-19 to 97.8% during the pandemic, mainly using WhatsApp, Zoom, and E-mails. Barriers included bad internet connection, patients preferring face-to-face consultation, and lacking technical literacy; benefits included scheduling and time flexibility, decrease in practice-related costs, and compliance with social distancing measures. LDs found Telehealth applicable in Lebanon and expressed their need for trainings and guidelines for proper implementation and sustainability.

1           **Telehealth during and beyond the COVID-19 Pandemic: Evidence from Licensed**  
2                                 **Dietitians in an Emerging Economy.**

3  
4                                 **ABSTRACT**

5    *Background:* The SARS-Cov-2 pandemic (COVID-19) sudden onset disrupted the direct access  
6    to face-to-face nutrition consultation fostering the rapid adoption of Telehealth by dietitians.

7    *Objective:* This study investigates Telehealth use among Lebanese Licensed Dietitians (LDs)  
8    amid COVID-19, in the absence of national Telehealth practical guidelines (TPG), and offers  
9    insights on Telehealth application under uncertainties of pandemic event, economic crisis, and  
10    destructured infrastructure occurring simultaneously in Lebanon.

11    *Design:* A cross-sectional study during March 2023, using an anonymous online survey (44  
12    questions), diffused through the Lebanese Order of Dietitians and social media platforms.

13    *Participants:* The sample (n=94) consisted mostly of females (98.9%) and young dietitians  
14    (mean(SD) age: 30.54(6.41) years) having a mean(SD) of 7.89(5.7) years of experience. Most  
15    respondents identified clinical nutrition as their primary practice area (87.2%), mostly in weight  
16    management (84%).

17    *Main outcome measures:* Telehealth experience amid COVID-19 including tools utilized in  
18    remote consultations, barriers, facilitators, and perspectives of Telehealth use.

19    *Statistical analyses:* Descriptive analysis (counts, frequencies) using SPSS version 28.

20    *Results:* Although 48.4% of LDs reported using Telehealth prior COVID-19, this proportion  
21    increased to 97.8% during the pandemic. The most common tools used were WhatsApp (90.3%),  
22    Zoom (72.0%), and E-mails (41.9%). Reported barriers included bad internet connection  
23    (74.2%), patients preferring face-to-face consultation (61.3%), and patients lacking technical

24 literacy (33.3%); benefits included scheduling and time flexibility (83.9%), decrease in practice-  
25 related costs (77.4%), and compliance with social distancing measures (53.8%). The majority  
26 agreed that Telehealth is needed (78.5%) and applicable in the Lebanese context (64.6%) and  
27 expressed the need for Telehealth trainings (78.5%) and TPG for nutrition care (74.2%).

28 *Conclusions:* This study recognizes increasing use of Telehealth in Lebanon, warranting the  
29 development of Telehealth nutrition care infrastructure comprising national regulations and  
30 evidence-based practical guidelines to respond to the innovation in the healthcare industry, and  
31 to assure Telehealth sustainability in LDs' routine practice.

## **Telehealth during and beyond the COVID-19 Pandemic: Evidence from Licensed Dietitians in an Emerging Economy**

32

### **33 Introduction**

34       The SARS-Cov-2 pandemic (COVID-19) sudden onset caused severe lifestyle changes  
35 impacting negatively on the mental and physical health of individuals. Moreover, it severely  
36 disrupted the access to hospitals and clinics for face-to-face consultation and therapy. To  
37 overcome these challenges, a paradigm shift toward digital health and remote clinical services  
38 was seen among healthcare providers and dietitians.<sup>1</sup> Facilitated by the emergence of information  
39 and communication technology (ICT) and direct-to-consumer virtual devices for data collection,  
40 Telehealth became an alternative and effective tool for nutrition care in time of pandemic.<sup>2,3,4</sup>

41       The public health emergency declaration of COVID-19 by the World Health  
42 Organization (WHO) followed by the lockdown imposed in March 2020 in Lebanon, have  
43 similarly exposed the medical sector to remote consultations, which became the “significant  
44 mediator for the resilience of the care system”.<sup>5</sup> Prior to COVID-19, the country was in the  
45 primary phase of incorporating Telehealth practices into its health system with some hospital-  
46 based virtual services performed exclusively in the private sector.<sup>6</sup> Unfortunately, the legal  
47 infrastructure supporting the development of Telehealth systems was very weak. The Law  
48 Decision No. 1/227 governing the introduction of electronic and digital services in Lebanon  
49 issued in 2013 was not implemented and official Telehealth practice guidelines (TPG) and  
50 standards were still missing.<sup>7</sup> The national E-Health Program foreseeing the incorporation of  
51 Telehealth and mobile health in respect to the principles of e-Health ethics (confidentiality,  
52 credibility, and privacy of health information) was not yet fully integrated into the health

53 system.<sup>7</sup> However, TPG and national policies were found to be essential for the proper  
54 implementation and assessment of remote services and for defining Telehealth quality metrics  
55 and performance measurement.<sup>8</sup>

56 As such, and in low-to-middle-income countries like Lebanon, Telehealth experience  
57 during COVID-19 appeared to be one of a kind. In Lebanon, the pandemic event coincided with  
58 the occurrence of a severe economic crisis and a massive explosion at Beirut port. Consequently,  
59 the health system and the technological infrastructure in the capital were severely destructed and  
60 hit simultaneously by liquidity crisis, bank withdrawal restrictions, lack of electricity, shortage in  
61 fuel, scarcity of medical equipment, hyperinflation and job losses.<sup>9</sup> Under these circumstances,  
62 the financial crisis and the lack of available resources constituted additional barriers facing the  
63 adoption of advanced technology and the maturation and proper implementation of Telehealth.<sup>10</sup>  
64 In addition, barriers associated with the socioeconomic status appeared to aggravate furthermore  
65 Telehealth inequities and disparities in the access to care during the pandemic.<sup>11</sup>

66 In this context, and equally to other health providers, dietitians were exposed to remote  
67 practices. In addition to the decrease in immunity and the exacerbation of chronic diseases and  
68 malnutrition noted elsewhere, the food shortages and food insecurity caused by the socio-  
69 economic crisis exposed the Lebanese population at a greater risk of malnutrition aggravating  
70 more and more the health impact of COVID-19.<sup>12</sup>

71 To date, studies conducted on Telehealth use among dietitians in the Arab world during  
72 the pandemic have focused on the change in the workload, caseload, tasks and responsibilities of  
73 hospital dietitians, and the challenges faced in the nutrition management of COVID-19  
74 patients.<sup>13</sup> The use of social/mass media by dietitians to perform Telehealth during COVID-19  
75 was explored in Arab countries (such as in the UAE, KSA, Jordan...) and in Lebanon.<sup>14</sup>

76 Telehealth uptake by Lebanese physicians and Telehealth application for mental health amid the  
77 pandemic were studied, and findings on the increase use of Telehealth via video consultations for  
78 diagnosis and treatment have been reported.<sup>6,15,16</sup> Even though COVID-19 has imposed the rapid  
79 adoption of Telehealth, the performance of healthcare providers during telehealth sessions was  
80 positively impacted by the existence of legal frameworks and technological infrastructures.<sup>17</sup>  
81 Thus, and since the Lebanese laws failed to determine in which practice Telehealth can be  
82 eligible and applicable, in the absence of TPG, Lebanese physicians were urged to apply the  
83 general provisions related to their responsibility, liability, in-clinic medical errors and  
84 misdiagnosis to the virtual setting in order to properly conduct Telehealth services <sup>7</sup>.

85         Based on these observations, we may conclude that, although COVID-19 had caused a  
86 global surge in Telehealth uptake, there is a deep gap in the literature concerning Telehealth use  
87 in the absence of TPG, and in countries suffering from economic crisis and weak infrastructures.  
88 On the other hand, Telehealth modalities adopted by healthcare providers, and specifically by  
89 dietitians in the MENA region, to respond to the dynamic change induced by COVID-19 in the  
90 healthcare system are not well explored. Further, there is a limited evidence on the importance of  
91 Telehealth services for nutrition care in the post-COVID-19 period, and for the health care  
92 system stability in this region.

93         To fill this gap, we addressed several research questions by conducting an exploratory  
94 research study using a cross-sectional, anonymous online survey administered to LDs during the  
95 month of March, 2023. The survey explored Telehealth uptake among LDs during COVID-19  
96 and the sustainability of its application beyond the pandemic. In addition, it identified Telehealth  
97 modalities, challenges, benefits and perspectives experienced by LDs in the absence of TPG and  
98 where poor infrastructure and economic crisis prevail.



99 To achieve this goal, this study addresses the following questions: (1) Did the use of  
100 Telehealth by LDs change at the onset of the COVID-19 pandemic? (2) What tools and  
101 modalities did LDs use during Telehealth consultations and in the absence of TPG? (3) What  
102 were the benefits and barriers facing Telehealth use among LDs in Lebanon? and (4) What was  
103 the perspective of LDs on Telehealth experience during and post-pandemic in Lebanon?

104 Hence, the main contributions of this study include the following:

105 – Analysis on Telehealth use among LDs amid the pandemic and in the absence of TPG,  
106 with identification of perspectives, barriers, facilitators and benefits.

107 – Applicability of Telehealth for nutrition care in the Lebanese context.

108 – Identification of challenges facing the continuous improvement of Telehealth and its  
109 future implications in Lebanon along with state-of-the-art recommendations for its sustainability  
110 beyond COVID-19.

111 – Recommendations toward the incorporation of authorized Telehealth platforms into the  
112 Lebanese health system along with the development of Telehealth national policies, technical  
113 regulations, standards, protocol of care, and professional development.

114 – Promotion of Telehealth as a strategic and sustainable model to be incorporated into the  
115 normal dietetic practice in countries suffering from conflicts and economic instability.

116

117 Finally, this study constitutes a cornerstone for the developing of the Lebanese Telehealth  
118 nutrition system and its national legal framework, policies and TPG. This will assure Telehealth  
119 proper implementation and sustainability beyond the pandemic event and the socio-economic  
120 crisis and contribute to the incorporation of a remote evidence-based nutrition care into the  
121 routine practice of the LDs.

## 122 **Methods**

### 123 **Survey development and design.**

124 A cross-sectional study was performed using an online questionnaire adapted from a  
125 peer-reviewed questionnaire published previously in the literature.<sup>18</sup> The original questionnaire  
126 was modified by removing questions that were not aligned with the practices in Lebanon (such  
127 as the estimated percentage of the patient population covered by Medicare). The study  
128 questionnaire was divided into 4 sections with a total of 44 questions covering LDs'  
129 demographic, educational and professional characteristics, Telehealth experience before and  
130 during the pandemic, tools used, barriers, facilitators and benefits, and LDs' perspectives on their  
131 Telehealth experience. The questionnaire was pilot-tested and the pilot-testing feedback was  
132 used to develop the questionnaire final version.

133 The inclusion criteria of the study were: Lebanese dietitian, holder of a bachelor's degree  
134 in Human Nutrition and Dietetics, licensed by the Lebanese Ministry of Public Health (MOPH),  
135 and practicing in Lebanon during COVID-19.

136

### 137 **Data collection**

138 To maximize the survey reach in the absence of a full list of LDs, and to avoid the risk of  
139 not receiving direct emails, a link to the survey's Google form was shared among LDs through  
140 the Lebanese Order of Dietitians, social media platforms (WhatsApp, LinkedIn, and Facebook)  
141 and with nutrition faculties and alumni of Lebanese universities. To avoid overlap and  
142 duplication in data collection, LDs who previously completed the questionnaire were asked not  
143 to participate. Google Forms was used to collect the survey data.

144

145 **Ethical considerations**

146           The study was reviewed and approved by the Lebanese American University Institutional  
147 Review Board (LAU IRB): LAU.SAS.RR1.29/Nov/2022. Informed consent was implied by  
148 voluntary completing the questionnaire. Google Forms settings were adjusted to ensure that  
149 personal data, such as emails and IP address were not collected. The participation in the study  
150 was anonymous, voluntary, and non-payable.

151

152 **Statistical analysis**

153           The survey data were descriptively managed and analyzed using Statistical Package for  
154 the Social Sciences (SPSS, Version 28). The means and standard deviations (SD) were presented  
155 for continuous variables, whereas counts and percentages were presented for categorical  
156 variables.

157

158 **Results**

159 **Participants' characteristics**

160 In total, 94 LDs were included in this study. The sample consisted mostly of females  
161 (98.9%) and young dietitians (mean (SD) age: 30.54 (6.41) years), with a master's degree  
162 (58.5%), and a mean (SD) of 7.89 (5.7) years of experience in dietetics practice. Most  
163 respondents (87.2%) identified clinical nutrition as their primary practice area, concentrating on  
164 weight management (84%), food and nutrition consultation (58.5%), and diabetes care (45.7%).  
165 Table 1 describes the socio-demographic characteristics of the participants.

166

**Table 1.** The Socio-Demographic Characteristics of a Cross-Sectional Sample of LDs<sup>a</sup> Practicing in Lebanon and Using Telehealth During COVID-19<sup>b</sup> (N=94)

| <b>Survey questions</b>                                   | <b>N (%)</b> |
|-----------------------------------------------------------|--------------|
| <b>Highest degree earned</b>                              |              |
| Bachelor's                                                | 33 (35.1)    |
| Master                                                    | 55 (58.5)    |
| Doctorate                                                 | 6 (6.4)      |
| <b>Focus area in which most time is spent<sup>d</sup></b> |              |
| Renal nutrition                                           | 18 (19.1)    |
| Diabetes care                                             | 43 (45.7)    |
| Gerontological (Elderly) nutrition                        | 11 (11.7)    |
| Weight management                                         | 79 (84)      |
| Eating disorders                                          | 25 (26.6)    |
| Oncology                                                  | 10 (10.6)    |
| Pediatric nutrition                                       | 24 (25.5)    |
| Food and nutrition consultation                           | 55 (58.5)    |
| Generalist                                                | 14 (14.9)    |
| Other <sup>c</sup>                                        | 52 (55.3)    |
| <b>Life stages of populations worked with<sup>d</sup></b> |              |
| Adults (ages 22-64)                                       | 94 (100)     |
| Older adults (age 65+)                                    | 49 (52.1)    |
| Teenagers and young adults (ages 13-21)                   | 70 (74.5)    |

|                                                                               |                              |
|-------------------------------------------------------------------------------|------------------------------|
| Children (ages 6-12)                                                          | 47 (50)                      |
| Pregnant/ postpartum women                                                    | 52 (55.3)                    |
| Young children (ages 1-5)                                                     | 21 (22.3)                    |
| Infants                                                                       | 8 (8.5)                      |
| <b>Practice area in which most time is spent<sup>d</sup></b>                  |                              |
| Clinical nutrition                                                            | 82 (87.2)                    |
| Community nutrition                                                           | 19 (20.2)                    |
| Consultancy                                                                   | 25 (26.6)                    |
| Education                                                                     | 34 (36.2)                    |
| Entrepreneurship                                                              | 11 (11.7)                    |
| <b>Practice area in which 20% of your time is spent<sup>d</sup></b>           |                              |
| Clinic                                                                        | 49 (52.1)                    |
| Hospital                                                                      | 18 (19.1)                    |
| Primary care center                                                           | 8 (8.5)                      |
| Other <sup>e</sup>                                                            | 62 (66)                      |
|                                                                               | <b>Mean (SD)<sup>f</sup></b> |
| <b>Years of experience as LDS</b>                                             | 7.9 (5.7)                    |
| <b>Hours per week providing face-to-face nutrition care prior to COVID-19</b> | 6.4 (6.5)                    |
| <b>Average number of patients consulted per day</b>                           | 10.7 (11.5)                  |

---

167 <sup>a</sup> LDs = Lebanese Licensed Dietitians.

168 <sup>b</sup> COVID-19 = The SARS-Cov-2 pandemic

169 <sup>c</sup> Respondents were able to select all options that applied.

170 <sup>d</sup> Pregnancy nutrition, hypertension, dyslipidemia, sports nutrition, pediatric nutrition, children  
171 with disabilities, gastrointestinal diseases

172 <sup>e</sup> Academia, consultancy, public health nutrition, community nutrition, food service, food safety  
173 and quality control

174 <sup>f</sup> Mean(SD) = Mean standard deviation

175

## 176 **Telehealth experience during COVID-19 pandemic**

177 The experience of LDs on Telehealth use for nutrition care prior to and during the  
178 pandemic are provided in Table 2. Although 48.4% (N=45) of the respondents reported using  
179 Telehealth for nutrition care before the pandemic, this proportion increased drastically to 97.8%  
180 (N=91) during COVID-19. LDs who reported using Telehealth before the onset of the pandemic  
181 had a mean (SD) of 1.43 (2.5) years of experience doing so. During the pandemic, the main tools  
182 used to provide Telehealth nutrition care and illustrated in Figure 1, were WhatsApp (90.3%),  
183 Zoom (72.0%), E-mails (41.9%), and telephone (39.8%). During Telehealth sessions, LDs relied  
184 mostly on video calls (83.9%) followed by voice calls (67.7%) and voice messages (65.6%) and  
185 the majority (51.6%) spent more than 30 minutes in direct contact with individuals or group to  
186 collect information on food and nutrition-related history (94.6%), patient history (89.2%), patient  
187 behavior (74.2%) and, knowledge, beliefs, and attitudes (72.0%). LDs communicated the results  
188 of Telehealth sessions to the referring medical provider by relying the most on social media  
189 applications (40.9%), e-mail (21.5%) and electronic medical record (20.4%).

190

**Table 2.** LDs<sup>a</sup> Respondents' Experience in Providing Telehealth for Nutrition Care Prior to and During COVID-19<sup>b</sup> in Lebanon (N=93)

| <i>Survey Questions</i>                                         | <i>N (%)<sup>c</sup></i> |
|-----------------------------------------------------------------|--------------------------|
| <b>Provided nutrition care via Telehealth prior to Covid-19</b> |                          |
| Yes                                                             | 45 (48.4)                |

16

|                                                                                                     |                              |
|-----------------------------------------------------------------------------------------------------|------------------------------|
| No                                                                                                  | 48 (51.6)                    |
| <b>Received training on the use of Telehealth prior to Covid-19</b>                                 |                              |
| Yes                                                                                                 | 8 (8.6)                      |
| No                                                                                                  | 85 (91.4)                    |
|                                                                                                     | <b>Mean (SD<sup>d</sup>)</b> |
| <b>Years of experience in providing nutrition care via Telehealth prior to Covid-19<sup>e</sup></b> | 1.43 (2.5)                   |
| <b>Hours per week providing face-to-face nutrition care prior to COVID-19 pandemic</b>              | 10.7 (11.5)                  |

**N (%)**

|                                                                                            |           |
|--------------------------------------------------------------------------------------------|-----------|
| <b>Provided nutrition care via Telehealth for patients in Lebanon during Covid-19</b>      |           |
| Yes                                                                                        | 91 (97.8) |
| No                                                                                         | 2 (2.2)   |
| <b>Provided nutrition care via Telehealth for patients outside Lebanon during COVID-19</b> |           |
| Yes                                                                                        | 47 (50.5) |
| No                                                                                         | 28 (30.1) |
| <b>Provided nutrition care via Telehealth from Lebanon during COVID-19</b>                 |           |
| Yes                                                                                        | 92 (98.9) |
| No                                                                                         | 1 (1.1)   |



192

---

### **Targets of nutrition care via Telehealth during COVID-19**

|                             |           |
|-----------------------------|-----------|
| Individuals                 | 70 (75.3) |
| Both individuals and groups | 23 (24.7) |

### **Tools used to perform Telehealth for nutrition care during COVID-19<sup>fg</sup>**

|                                                                       |           |
|-----------------------------------------------------------------------|-----------|
| WhatsApp                                                              | 84 (90.3) |
| Zoom                                                                  | 67 (72.0) |
| E-mails                                                               | 39 (41.9) |
| Telephone (Regular audio-only)                                        | 37 (39.8) |
| Skype                                                                 | 9 (9.7)   |
| Apple Face Time                                                       | 2 (2.2)   |
| Microsoft Teams                                                       | 13 (14.0) |
| Zoom for healthcare                                                   | 3 (3.2)   |
| Electronic Health Record                                              | 3 (3.3)   |
| Doxy.me                                                               | 0 (0)     |
| Cisco WebEx                                                           | 2 (2.2)   |
| Social media application (Instagram, Facebook, Facebook messenger...) | 18 (19.4) |
| Other <sup>h</sup>                                                    | 21 (22.6) |

### **Telehealth features used during Covid-19<sup>g</sup>**

|                                                                   |           |
|-------------------------------------------------------------------|-----------|
| Voice call                                                        | 63 (67.7) |
| Text message                                                      | 53 (57.0) |
| Voice message                                                     | 61 (65.6) |
| Media (photo, video, radiological imaging, laboratory results...) | 44 (47.3) |

Video calls 78 (83.9)

193

**Types of nutrition assessment<sup>i</sup> and/or monitoring and evaluation<sup>j</sup> conducted via Telehealth during COVID-19<sup>g</sup>**

Food and nutrition related history 88 (94.6)

Patient history 83 (89.2)

Knowledge/ beliefs/ attitudes 67 (72.0)

Behavior 69 (74.2)

Anthropometric measurements 58 (62.4)

Physical activity and function 71 (76.3)

Factors affecting access to food and food/ nutrition related supplies 51 (54.8)

Biochemical data, medical tests, and procedures 65 (69.9)

Medication and complementary medicine use 55 (59.1)

Food and nutrient administration 47 (50.5)

Other<sup>k</sup> 74 (79.6)

**Types of nutrition interventions<sup>l</sup> provided via Telehealth during COVID-19<sup>g</sup>**

Nutrition counseling 84 (90.3)

Nutrition education 82 (88.2)

Coordination of nutrition care with healthcare professionals 26 (28.0)

Food and/ or nutrient delivery 20 (21.5)

Enteral and parenteral nutrition 6 (6.5)

Population-based nutrition action 8 (8.6)

Other<sup>m</sup> 53 (57.0)

194

### **Patients consulted via Telehealth during Covid-19**

|                                            |           |
|--------------------------------------------|-----------|
| Patients you already know                  | 83 (89.2) |
| Patients you already Know and new patients | 66 (71.0) |
| New patients                               | 76 (81.7) |

### **Method of communicating results of Telehealth back to referring medical provider during COVID-19<sup>g</sup>**

|                                                                    |           |
|--------------------------------------------------------------------|-----------|
| I documented the interaction through an electronic medical record  | 19 (20.4) |
| I sent an e-mail to the medical provider                           | 20 (21.5) |
| I sent a fax to the medical provider                               | 1 (1.1)   |
| I used social media applications (WhatsApp, Facebook Messenger...) | 38 (40.9) |
| I called the medical provider's office                             | 7 (7.5)   |
| I do not communicate the interaction                               | 4 (4.3)   |
| I do not have any referral medical provider                        | 33 (35.5) |
| Other <sup>n</sup>                                                 | 3 (3.2)   |

### **Telehealth used for continuing medical education during COVID-19**

|     |           |
|-----|-----------|
| Yes | 71 (76.3) |
| No  | 22 (23.7) |

### **Telehealth sessions' average minutes spent having direct client(s) contact during COVID-19**

|                      |           |
|----------------------|-----------|
| Less than 30 minutes | 16 (17.2) |
| 30 minutes           | 29 (31.2) |
| More than 30 minutes | 48 (51.6) |

<sup>a</sup> LD = Lebanese Licensed Dietitians

<sup>b</sup> COVID-19 = The SARS-Cov-2 pandemic

<sup>c</sup> Does not include missing responses

<sup>d</sup> Mean (SD) = Mean standard deviation

<sup>a</sup> For respondents who indicated they provided nutrition care via Telehealth prior to the COVID-19 pandemic

<sup>a</sup> For respondents who indicated they provided nutrition care via Telehealth using tools

<sup>a</sup> Respondents were able to select all options that applied

<sup>a</sup> Google Duo, Drapp, Mynutriboxapp, Sohati, Google Meet, Botim

<sup>a</sup> Nutrition assessment, the first step of the nutrition care process, is a systematic approach to collect, classify, and synthesize important and relevant data needed to identify nutrition-related problems and their causes.

<sup>a</sup> Nutrition monitoring and evaluation follows nutrition intervention in the nutrition care process and identifies outcomes/indicators relevant to the diagnosis and nutrition intervention plans and goals.

<sup>a</sup> Other detailed answers not provided by survey participants

<sup>a</sup> A nutrition intervention follows nutrition diagnosis in the nutrition care process and is a purposefully planned action(s) designed with the intent of changing a nutrition-related behavior, risk factor, environmental condition, or aspect of health status to resolve or improve the identified nutrition diagnosis(es) or nutrition problem(s).

<sup>a</sup> Other detailed answers not provided by survey participants

<sup>a</sup> Other detailed answers not provided by survey participants

196

197

198 **Barriers, facilitators, benefits and perspectives related to Telehealth use.**

199 The reported barriers, facilitators and benefits of Telehealth use during COVID-19 are

200 illustrated in Table 3. The most reported barriers facing Telehealth nutrition care were bad

201 connections (74.2%) followed by patients preferring face-to-face consultation (61.3%), and

202 patients lacking technical literacy (33.3%). Among the benefits, LDs reported scheduling  
203 flexibility (83.9%), the decrease in practice-related costs (77.4 %), the promotion of technology  
204 acceptance and penetration (69.9 %) in addition to the compliance with COVID-19 social  
205 distancing measures (53.8%). As demonstrated in Figure 2, during the pandemic, most  
206 respondents did not receive any trainings on how to properly conduct Telehealth (93.5%) and did  
207 not consult any specific guidance (94.6%). The majority agreed that Telehealth is needed in  
208 Lebanon (78.5%), 64.6% believed that Telehealth is applicable in the Lebanese context and a  
209 high number expressed their willingness to use Telehealth after the pandemic (81.7%). Adding to  
210 this, 78.5% reported their interest in receiving future trainings on Telehealth for nutrition care  
211 and 74.2% expressed their need for specific TPG to properly conduct remote nutrition care  
212 (74.2%).

213

**Table 3.** LDs<sup>a</sup> Reported Barriers, Facilitators and Benefits of Telehealth Use during COVID-19<sup>b</sup>  
in Lebanon (N=93)

| <b>Telehealth Barriers, Facilitators and Benefits during COVID-19<sup>b</sup></b>     | <b>Responses<sup>c</sup></b> |
|---------------------------------------------------------------------------------------|------------------------------|
| <b>Barriers experienced by delivering nutrition care via Telehealth<sup>d</sup></b>   | <b>N (%)</b>                 |
| Providers not having an internet access                                               | 22 (23.7)                    |
| Bad connection during sessions                                                        | 69 (74.2)                    |
| Discomfort delivering nutrition care via Telehealth                                   | 14 (15.1)                    |
| Not being able to conduct or evaluate nutrition assessment, monitoring and evaluation | 30 (32.3)                    |
| Not being able to deliver some routine nutrition interventions via Telehealth         | 15 (16.1)                    |
| Not having remote access to the electronic health record at my home                   | 13 (14.0)                    |

|                                                                                                    |           |
|----------------------------------------------------------------------------------------------------|-----------|
| Not having appropriate equipment to deliver Telehealth                                             | 24 (25.8) |
| Difficulty with establishing relationships/therapeutic alliance via Telehealth                     | 14 (15.1) |
| Lack of patient referrals from medical providers                                                   | 22 (23.7) |
| Lack of employer support                                                                           | 2 (2.2)   |
| Patients not interested in having any nutrition services via Telehealth                            | 23 (24.7) |
| Patients not interested in having any nutrition services at time of COVID-19                       | 15 (16.1) |
| Patients preferred face-to-face consultations                                                      | 57 (61.3) |
| Patients not having internet access                                                                | 36 (38.7) |
| Patients not having landline phones or cellphones                                                  | 4 (4.3)   |
| Patients not cooperant during Telehealth consultations                                             | 17 (18.3) |
| Patients lack in technical literacy                                                                | 31 (33.3) |
| Concerns about privacy and confidentiality                                                         | 8 (8.6)   |
| Others <sup>e</sup>                                                                                | 49 (52.7) |
| <b>Telehealth facilitators experienced by delivering nutrition care via Telehealth<sup>d</sup></b> |           |
| COVID-19 created an atmosphere of technology acceptance and penetration                            | 65 (69.9) |
| Past experience with Telehealth nutrition care                                                     | 11 (11.8) |
| Ease of use                                                                                        | 53 (57.0) |
| Increased communication with patient                                                               | 39 (41.9) |
| Increased communication with other health professionals                                            | 28 (30.1) |
| Others <sup>f</sup>                                                                                | 24 (25.8) |
| <b>Benefits experienced by delivering nutrition care via Telehealth<sup>d</sup></b>                |           |
| Promoting compliance with social distancing measures of COVID-19                                   | 50 (53.8) |
| Scheduling and time flexibility                                                                    | 78 (83.9) |

Decrease costs related to practice (rent, transportation, equipment, stationary...) 72 (77.4)

---

<sup>a</sup> LDs = Lebanese Licensed Dietitians

<sup>b</sup> COVID-19 = The SARS-Cov-2 pandemic

<sup>c</sup> Does not include missing responses

<sup>d</sup> Respondents were able to select all options that applied

<sup>e</sup> Other detailed answers not provided by survey participants

<sup>f</sup> Other detailed answers not provided by survey participants

215 **Discussion**

216 This study is the first to investigate Telehealth use among LDs prior and during COVID-  
217 19 in the absence of national Telehealth practice guidelines (TPG), standards and best practices  
218 assuring ethical and safe practices. It identifies Telehealth tools, benefits and barriers, and offers  
219 insights on Telehealth applicability in the Lebanese context and its effectiveness and future  
220 sustainability.

221 Amid COVID-19, this study reports an increase in Telehealth use among LDs which is  
222 expected as it mimics the trend reported by other healthcare professionals in Lebanon, and by  
223 dietitians in other countries.<sup>6,14,19</sup> Remarkably, the majority of LDs (97.8%) reported using  
224 Telehealth for nutrition care amid COVID-19. In time of pandemic, Telehealth is perceived as a  
225 viable tool able to overpass lockdown measures, assure patient safety, maintain the cycle of life,  
226 and improve the mental health and quality of life.<sup>18,20</sup> However, we note a high use of Telehealth  
227 practices among LDs before COVID-19 (48.4%) whereas only 15% of dietitians in Italy and  
228 37% of dietitians in the US performed Telehealth activities prior the pandemic.<sup>20</sup> This could be  
229 related to the fact that some Telehealth activities were initiated in the country before the  
230 pandemic onset as alternative practices to encompass the impact of the socioeconomic crisis,  
231 notably the scarcity of resources, lack of job opportunities, and limitation of transportation.<sup>6,21</sup> As  
232 such, and with limited financial resources, LDs might have resorted to remote modalities of  
233 nutrition care. More, and despite the pre-pandemic Telehealth activities, the majority  
234 concentrated on face-to-face consultations in clinics (82%) and hospitals, suggesting herein that  
235 Telehealth pre-pandemic practices were used to follow-up on LDs' existing patients and/or for  
236 continuous education. Similar pre-pandemic observations were noted among Lebanese  
237 physicians who, with limited financial resources caused by the economic crisis, couldn't travel to



238 attend international conference and relied mainly on Telehealth for continuing medical  
239 education.<sup>6</sup> More, the use of video-conferencing for Telehealth consultations was reported low  
240 among Lebanese physicians before the pandemic.<sup>6</sup>

241 In contrast, COVID-19 imposed the rapid shift to audiovisuals and video-conferencing.  
242 LDs embraced Telehealth with uptake being centered in private practices and among newly  
243 graduated LDs. The rapid uptake of Telehealth observed in the country could be explained by the  
244 fact that LDs population was young (mean (SD) age: 30.54 (6.41) years), familiar to new  
245 technologies and in priory exposed to smart applications, which came similar to a study  
246 conducted on Italian dietitians.<sup>20</sup> Same findings were reported in the MENA region.<sup>13</sup>

247 Thus, LDs initiated Telehealth amid COVID-19 by relying on WhatsApp (90.3%) as a  
248 main tool followed by Zoom (72.0%), Emails (41.9%) and phone calls (39.8%). In parallel,  
249 Lebanese physicians reported using WhatsApp (79%), phone calls (77%) and email (63%), in  
250 addition to Zoom and social media platforms (such as Facebook, YouTube and Instagram).<sup>6</sup>  
251 Remarkably, and during COVID-19, the use of mobile applications/software as Telehealth tools  
252 was highly observed in low-to-middle income countries, with preferences for audio-visuals (such  
253 as WhatsApp, Zoom, Facebook Messenger and Skype).<sup>22</sup> This was reflected in our study, and  
254 showed that LDs were able to select Telehealth tools adapted to the country's economic status  
255 despite the absence of guidance in this direction. These tools offered LDs an atmosphere similar  
256 to clinics, allowing direct interactions with patients (inside and outside Lebanon), collection of  
257 data, feedback, and evaluation. In contrast, the use of Zoom for healthcare and electronic medical  
258 record was minimal (around 3%) and exclusively reported among LDs working in hospitals. In  
259 fact, Electronic health care records were incorporated in some major private hospitals before the  
260 pandemic but their use was limited to the context of some practices.<sup>6</sup>

261 More, Telehealth platforms available in Lebanon (such as TrakMD, SohatiDoc, Doctori, and  
262 Drapp) were not been authorized by MOPH and the Lebanese Order of Physicians.<sup>23</sup> Due to  
263 these facts, Lebanese physicians and patients reported their preference in using WhatsApp  
264 instead of Telehealth platforms as it offered them spontaneous, informal and free of charge  
265 conversations.<sup>23</sup>

266 The findings of this study reflect the failure of the Lebanese nutrition care system in  
267 integrating Telehealth into the routine practice. As a result, LDs were not professionally  
268 equipped to initiate remote consultations and their profession and resilience were challenged by  
269 the pandemic. This can explain their resort to mobile and social media applications (such as  
270 WhatsApp, Facebook Messenger...) (40.9%) and the use of direct emails (21.5%) to  
271 communicate with referring medical providers. Social media applications emerged hereafter as  
272 alternative Telehealth tools offering direct communication with patients, medical providers and  
273 colleagues, and indirect communication with virtual profiles via its platforms. In contrast to other  
274 scientific-based applications and business communication platforms, social media gave LDs the  
275 opportunity to create dietetic contents enhanced with graphics and effects allowing the  
276 exponential dissemination of flow of knowledge with interdisciplinary integration. Hence,  
277 dietitians were able to go beyond counselling and nutrition care and to address concerns, social  
278 trends and common interests experienced in times of pandemic.<sup>14</sup>

279 Relying on this, this study acknowledges that, in the absence of authorized Telehealth  
280 systems and legal framework, and with the presence of weak infrastructure, socio-economic  
281 crisis and limited resources, resorting to social media during the pandemic supported the  
282 resilience of LDs and offered them business opportunities and marketing experience to grow. In  
283 the same direction, the use of social media was largely reported in other Arab countries (such as

284 the UAE, KSA and Jordan) and appeared to be an effective Telehealth tool during COVID-19,  
285 despite concerns over privacy and data misuse.<sup>13</sup>

286 During the remote nutrition care, LDs identified several barriers centered around bad  
287 connections (74.2%), patients preferring face-to-face consultation (61.3%) and patients lacking  
288 technical literacy (33.3%). They expressed their discomfort during Telehealth sessions and faced  
289 barriers specific related to the dietetic profession such as difficulties in collecting physical data,  
290 and conducting nutrition assessment (32.3%). In addition, cultural barriers related to privacy  
291 concerns identified in our study came similar to those reported in the US and in Arab countries  
292 (such as Egypt, Jordan, the United Arab Emirates (UAE...)).<sup>13,18,24</sup>

293 One of the notable findings to emphasize on in this study, is the delivery of nutrition care  
294 outside Lebanon which was reported by 50.5% of LDs. Such practices can have legal  
295 implications in normal circumstances and were only possible during the pandemic due to the  
296 relaxation of Telehealth regulations.<sup>18</sup> Consequently, the lack of knowledge in the legal and  
297 ethical aspects of Telehealth use between countries, points out on the necessity of TPG and  
298 professional training. In similar, a minority of physicians in KSA reported being aware of the  
299 existent regulations governing Telehealth proper delivery via smart devices, which emphasizes  
300 on the need for guidance regulations.<sup>25</sup>

301 Nevertheless, LDs were able to identify Telehealth benefits such as scheduling flexibility  
302 (83.9%), decrease in practice-related costs (77.4%), and promoting compliance with social  
303 distancing measures (53.8%). The mean (SD) rating of their overall experience scored 6.62, on a  
304 scale from 1 to 10. They found Telehealth being effective and applicable in Lebanon and highly  
305 expressed their need for TPG and trainings. They were aware of the absence of legal framework

306 and professional support assuring the protection of exercise, confidentiality, security, and  
307 privacy (Table 3). Similar needs were expressed by dietitians in Italy and in the UAE.<sup>13,20</sup>

308 In conclusion, the study results complement the findings noted among dietitians in other  
309 countries, and among other medical professionals in Lebanon. The Lebanese Telehealth  
310 experience appeared to resemble the experience described in the MENA region during COVID-  
311 19.<sup>26</sup> Yet, we demonstrate that Telehealth is effective, applicable and needed in the Lebanese  
312 context as an alternative and resilient tool in time of pandemic, disaster and severe crisis with  
313 willingness to use it after COVID-19.

314

315 **Strengths and Limitations**

316 This study pioneered in exploring Telehealth use among LDs in the absence of TPG  
317 during COVID-19. To provide meaningful results, enable comparisons and increase the survey's  
318 reach, we adapted a questionnaire previously used in other studies to the Lebanese setting, and  
319 diffused an online survey via official channels and social media platforms. As such and in a short  
320 period of time, data was collected simultaneously from several participants without influencing  
321 any of their responses. However, the results were limited by being self-reported rather than  
322 observed, and the data collection might be subject to social desirability bias such as participants  
323 might have changed their answers in order to reflect a more professional practice. Further, the  
324 survey was shared among selected professional Facebook groups, which could lead to selection  
325 bias. Participants who have previously used Telehealth might have been pre-selected by the  
326 topic, i.e., being subject to self-selection. On the other hand, and as noted in other studies, the  
327 LDs population was relatively young with few years of experience in the dietetic practice.<sup>18,20</sup>  
328 All these limitations might impact the generalizability of the findings for the larger LDs  
329 community. Finally, as this study was performed at the final stages of the pandemic, some  
330 answers might be subject to recall bias.

331

## 332 **Recommendations and future implications**

333           Conducted in March 2023 at the final stages of the pandemic, this study might enrich the  
334 literature by exploring Telehealth use over multiple episodes of virus waves and lockdowns. By  
335 presenting the experience of a country suffering from a severe economic crisis that exacerbated  
336 furthermore the burden induced by the pandemic, this study was able to tackle Telehealth  
337 application during economic crisis and disaster events. Thus, it promotes Telehealth as a  
338 potential strategy of nutrition care to be incorporated into the normal practice in countries  
339 suffering from economic instability and conflicts like Lebanon.<sup>22,27</sup>

340           More, the benefits reported in this study present a rationale for telehealth sustainability  
341 and future implications beyond the pandemic in Lebanon. As demonstrated in the literature, the  
342 willingness to use Telehealth after the pandemic is reported high among those who used  
343 Telehealth before COVID-19<sup>29</sup>. This was reflected in our study and shows that LDs can play a  
344 major role in the sustainability of Telehealth practices in the near future. More, this study  
345 recognizes that Telehealth sustainability can offer low-to-middle income countries like Lebanon,  
346 the opportunity to achieve the Sustainable Development Goals (SDGs) of quality, accessibility  
347 and availability of health services to all.<sup>28</sup> In this dimension, Telehealth sustainability and proper  
348 implementation could not be achieved without regulated and reliable Telehealth platforms able to  
349 secure personal and medical data, to assure patient's privacy and confidentiality, and to protect  
350 the dietitian-patient relationship.<sup>29</sup> Relaxed regulations during the pandemic have allowed the use  
351 of modalities such as social media and mobile applications, but health systems need to  
352 incorporate reliable platforms with appropriate privacy protection and validated security.<sup>30</sup>  
353 Taking into account the weak infrastructure and the scarcity of resources in Lebanon, we suggest  
354 developing a unified Lebanese Telehealth nutrition platform for the public and private sector.

355 This correlates well with recommendations of other studies to use platforms equipped with  
356 interface for nutrition care such as the Academy of Nutrition and Dietetics Health Informatics  
357 Infrastructure (ANDHII) and to overcome problems related to interoperability between different  
358 health systems.<sup>31, 32</sup> Developing TPG for nutrition care are fundamental for a safe and evidence-  
359 based standardized practice. These key elements can be translated into recommendations to the  
360 newly elected Lebanese Order of Dietitians to develop and harmonize, along with MOPH and  
361 other stakeholders, Telehealth legal framework comprising national policies, technical  
362 regulations, standards and protocol of care. These regulations must be complemented by the  
363 adoption of innovative technologies able to achieve Telehealth equity and accessibility among  
364 citizens and residents.

365         Beyond COVID-19, Telehealth sustainability requires the accreditation of Telehealth  
366 system for quality assurance, continuous improvement, evaluation of performance,  
367 standardization of protocols and operations, dissemination of Telehealth culture and acceptance,  
368 and protection of patient experience.<sup>33</sup> Developing a competent and skilled Telehealth workforce  
369 within healthcare institutions is primordial and help to overpass any resistance facing the  
370 adoption of new technologies.<sup>25,30</sup> Thus, we recommend continuous training and professional  
371 development for LDs (and other healthcare providers) on the proper use of Telehealth  
372 tools/modalities and on the ethical, privacy, legal and cultural aspects governing the virtual  
373 world.

374         The exceptional situation experienced during the pandemic catalyzed the integration of  
375 Telehealth activities within the health system and induced a paradigm shift in the practice and  
376 role of dietitians. At a glance, LDs were exposed to new models of nutrition care with innovative  
377 delivery modes from the virtual world. As a result, the sustainability of their carriers became

378 closely linked to their capabilities and agility to embrace innovative practices and to converge  
379 their role with the emergent core technologies of the Fourth Industrial Revolution (Big data,  
380 Genomics, Artificial intelligence, etc.).<sup>33</sup> More, personalized and precise nutrition care might  
381 replace the traditional treatment-oriented service in the healthcare system pushing hereafter  
382 dietitians toward the use of Telehealth nutrition platforms as part of their job routine.<sup>2</sup> As such,  
383 and in the near future, innovation in the field of Telehealth and digital health for nutrition care  
384 are required in Lebanon.

385



386 **Conclusion**

387           This study demonstrated the increase in Telehealth use among LDs amid COVID-19 and  
388 reports an overall satisfaction despite the absence of national regulations, TPG, and professional  
389 trainings. In this context, this study constitutes a foundation upon which Telehealth infrastructure  
390 and national TPG for nutrition care can be built upon. By presenting the experience of Lebanon,  
391 this study identified Telehealth as a strategic model applicable not only in time of pandemic and  
392 public health emergencies, but during economic crisis and scarcity of resources. Thus, it offers  
393 key elements for the future Telehealth sustainability and for the adoption of innovative patient-  
394 centered technologies. In this regard, further studies are needed in Lebanon to assess the  
395 effectiveness of Telehealth for nutrition care, its outcomes on the long run, the quality  
396 performance of its actors and the patient experience.

397

## References

1. El-Sherif DM, Abouzid M, Elzarif MT, Ahmed AA, Albakri A, Alshehri MM. Telehealth and Artificial Intelligence Insights into Healthcare during the COVID-19 Pandemic. Healthcare (Basel, Switzerland). 2022;10(2).
2. Kim GY, Seo JS. A New Paradigm for Clinical Nutrition Services in the Era of the Fourth Industrial Revolution. Clinical nutrition research. 2021;10(2):95-106.
3. Mauldin K, Gieng J, Saarony D, Hu C. Performing nutrition assessment remotely via telehealth. Nutrition in clinical practice : official publication of the American Society for Parenteral and Enteral Nutrition. 2021;36(4):751-68.
4. Doraiswamy S, Abraham A, Mamtani R, Cheema S. Use of Telehealth During the COVID-19 Pandemic: Scoping Review. Journal of medical Internet research. 2020;22(12):e24087.
5. Mohtar L, Badr NG. Telehealth: A Viable Option for Optimizing Health System Performance during COVID-19: Call to Action for Future Pandemics. 2022:279-88.
6. Helou S, El Helou E, Abou-Khalil V, Wakim J, El Helou J, Daher A, et al. The Effect of the COVID-19 Pandemic on Physicians' Use and Perception of Telehealth: The Case of Lebanon. International journal of environmental research and public health. 2020;17(13).

7. Takieddine M, El Gemayel M. Online medical consultation in Lebanon: Legal issues to consider. 2021.
8. Kobeissi MM, Hickey JV. An Infrastructure to Provide Safer, Higher-Quality, and More Equitable Telehealth. *Joint Commission journal on quality and patient safety*. 2023;49(4):213-22.
9. Knecht E. A matter of survival: Lebanon's hospitals on the brink as COVID cases surge. 2020.
10. Kissi J, Annobil C, Mensah NK, Owusu-Marfo J, Osei E, Asmah ZW. Telehealth services for global emergencies: implications for COVID-19: a scoping review based on current evidence. *BMC health services research*. 2023;23(1):567.
11. Chang JE, Lai AY, Gupta A, Nguyen AM, Berry CA, Shelley DR. Rapid Transition to Telehealth and the Digital Divide: Implications for Primary Care Access and Equity in a Post-COVID Era. *The Milbank quarterly*. 2021;99(2):340-68.
12. Corriero AC, Aborode AT, Reggio M, Shatila N. The impact of COVID-19 and the economic crisis on Lebanese public health: Food insecurity and healthcare disintegration. *Ethics, medicine, and public health*. 2022;24:100802.

13. Bookari K, Arrish J, Zaher S, Alkhalaf M, Alharbi M, Alkhattaf N, et al. A Snapshot of the Experience of Dietitians during the COVID-19 Crisis in Five Arab Countries: Findings from a Regional Cross-Sectional Study. *Nutrients*. 2022;14(22).
14. Bookari K, Arrish J, Alkhalaf MM, Alharbi MH, Zaher S, Alotaibi HM, et al. Perspectives and practices of dietitians with regards to social/mass media use during the transitions from face-to-face to telenutrition in the time of COVID-19: A cross-sectional survey in 10 Arab countries. *Frontiers in public health*. 2023;11:1151648.
15. Elkaddoum R, Haddad FG, Eid R, Kourie HR. Telemedicine for cancer patients during COVID-19 pandemic: between threats and opportunities. *Future oncology (London, England)*. 2020;16(18):1225-7.
16. Shaarani I, Ghanem A, Jounblat M, Jounblat H, Mansour R, Taleb R. Utilization of Telemedicine by the Lebanese Physicians During Time of Pandemic. *Telemedicine journal and e-health : the official journal of the American Telemedicine Association*. 2022;28(2):219-26.
17. Al-Alawy K, Moonesar IA. Perspective: Telehealth - beyond legislation and regulation. *SAGE open medicine*. 2023;11:20503121221143223.
18. Rozga M, Handu D, Kelley K, Jimenez EY, Martin H, Schofield M, et al. Telehealth During the COVID-19 Pandemic: A Cross-Sectional Survey of Registered Dietitian Nutritionists. *Journal of the Academy of Nutrition and Dietetics*. 2021;121(12):2524-35.

19. Omboni S, Padwal RS, Alessa T, Benczúr B, Green BB, Hubbard I, et al. The worldwide impact of telemedicine during COVID-19: current evidence and recommendations for the future. *Connected health*. 2022;1:7-35.
20. Gnagnarella P, Ferro Y, Monge T, Troiano E, Montalcini T, Pujia A, et al. Telenutrition: Changes in Professional Practice and in the Nutritional Assessments of Italian Dietitian Nutritionists in the COVID-19 Era. *Nutrients*. 2022;14(7).
21. Naal H, Whaibeh E, Mrad M. Evaluating the first university-based online graduate course on Telemental Health in the Middle East: Lessons learned from Lebanon. 2022.
22. Tiwari BB, Kulkarni A, Zhang H, Khan MM, Zhang DS. Utilization of telehealth services in low- and middle-income countries amid the COVID-19 pandemic: a narrative summary. *Global health action*. 2023;16(1):2179163.
23. Abou-Ghannam G, Abi-Habib R, Yaktine N. Teleconsultation Platforms Versus WhatsApp Consultations: Evaluating Patients and Physicians' Attitudes. *Telemedicine journal and e-health : the official journal of the American Telemedicine Association*. 2023.
24. Alborai M, Abdalgaber M, Youssef N, Moaz I, Abdeen N, Abosheishaa HM, et al. Healthcare Providers' Perspective about the Use of Telemedicine in Egypt: A National Survey. *International journal of telemedicine and applications*. 2022;2022:3811068.

25. El Kheir DYM, Alnufaili SS, Alsaffar RM, Assad MA, Alkhalifah ZZ. Physicians' Perspective of Telemedicine Regulating Guidelines and Ethical Aspects: A Saudi Experience. *International journal of telemedicine and applications*. 2022;2022:5068998.
26. Shamiyah KA, Whitebridge S, Kumar N, Aljenaee K, Atkin SL, Ali KF. The Impact of COVID-19 on the Prevalence and Perception of Telehealth Use in the Middle East and North Africa Region: Survey Study. *JMIR formative research*. 2023;7:e34074.
27. Snoswell CL, Chelberg G, De Guzman KR, Haydon HH, Thomas EE, Caffery LJ, et al. The clinical effectiveness of telehealth: A systematic review of meta-analyses from 2010 to 2019. *Journal of telemedicine and telecare*. 2023;29(9):669-84.
28. El-Jardali F, Bou-Karroum L, Jabbour M, Bou-Karroum K, Aoun A, Salameh S, et al. Digital health in fragile states in the Middle East and North Africa (MENA) region: A scoping review of the literature. *PloS one*. 2023;18(4):e0285226.
29. Elliott A, Gibson S. Exploring stakeholder experiences of dietetic service and care delivery: A systematic qualitative review. *Journal of human nutrition and dietetics : the official journal of the British Dietetic Association*. 2023;36(1):288-310.
30. Kaundinya T, Agrawal R. Unpacking a Telemedical Takeover: Recommendations for Improving the Sustainability and Usage of Telemedicine Post-COVID-19. *Quality management in health care*. 2022;31(2):68-73.

31. Naja F, Radwan H, Cheikh Ismail L, Hashim M, Rida WH, Abu Qiyas S, et al. Practices and resilience of dieticians during the COVID-19 pandemic: a national survey in the United Arab Emirates. *Human resources for health*. 2021;19(1):141.

32. Thomas EE, Haydon HM, Mehrotra A, Caffery LJ, Snoswell CL, Banbury A, et al. Building on the momentum: Sustaining telehealth beyond COVID-19. *Journal of telemedicine and telecare*. 2022;28(4):301-8.

33. Lee SG, Blood A, Gordon W, Scirica B. *Disruptive and Sustaining Innovation in Telemedicine: A Strategic Roadmap*. 2021.

## Tables

**Table 1.** The Socio-Demographic Characteristics of a Cross-Sectional Sample of LDs<sup>a</sup> Practicing in Lebanon and Using Telehealth During COVID-19<sup>b</sup> (N=94)

| Survey questions                                          | <i>N</i> (%) |
|-----------------------------------------------------------|--------------|
| <b>Highest degree earned</b>                              |              |
| Bachelor's                                                | 33 (35.1)    |
| Master                                                    | 55 (58.5)    |
| Doctorate                                                 | 6 (6.4)      |
| <b>Focus area in which most time is spent<sup>d</sup></b> |              |
| Renal nutrition                                           | 18 (19.1)    |
| Diabetes care                                             | 43 (45.7)    |
| Gerontological (Elderly) nutrition                        | 11 (11.7)    |
| Weight management                                         | 79 (84)      |
| Eating disorders                                          | 25 (26.6)    |
| Oncology                                                  | 10 (10.6)    |
| Pediatric nutrition                                       | 24 (25.5)    |
| Food and nutrition consultation                           | 55 (58.5)    |
| Generalist                                                | 14 (14.9)    |
| Other <sup>c</sup>                                        | 52 (55.3)    |
| <b>Life stages of populations worked with<sup>d</sup></b> |              |
| Adults (ages 22-64)                                       | 94 (100)     |
| Older adults (age 65+)                                    | 49 (52.1)    |



|                                         |           |
|-----------------------------------------|-----------|
| Teenagers and young adults (ages 13-21) | 70 (74.5) |
| Children (ages 6-12)                    | 47 (50)   |
| Pregnant/ postpartum women              | 52 (55.3) |
| Young children (ages 1-5)               | 21 (22.3) |
| Infants                                 | 8 (8.5)   |

**Practice area in which most time is spent<sup>d</sup>**

|                     |           |
|---------------------|-----------|
| Clinical nutrition  | 82 (87.2) |
| Community nutrition | 19 (20.2) |
| Consultancy         | 25 (26.6) |
| Education           | 34 (36.2) |
| Entrepreneurship    | 11 (11.7) |

**Practice area in which 20% of your time is spent<sup>d</sup>**

|                     |           |
|---------------------|-----------|
| Clinic              | 49 (52.1) |
| Hospital            | 18 (19.1) |
| Primary care center | 8 (8.5)   |
| Other <sup>e</sup>  | 62 (66)   |

***Mean (SD)<sup>f</sup>***

|                                                                               |             |
|-------------------------------------------------------------------------------|-------------|
| <b>Years of experience as LDS</b>                                             | 7.9 (5.7)   |
| <b>Hours per week providing face-to-face nutrition care prior to COVID-19</b> | 6.4 (6.5)   |
| <b>Average number of patients consulted per day</b>                           | 10.7 (11.5) |

---

<sup>1</sup> LDS = Lebanese Licensed Dietitians.

<sup>b</sup> COVID-19 = The SARS-Cov-2 pandemic

<sup>c</sup> Respondents were able to select all options that applied.

<sup>d</sup> Pregnancy nutrition, hypertension, dyslipidemia, sports nutrition, pediatric nutrition, children with disabilities, gastrointestinal diseases

<sup>e</sup> Academia, consultancy, public health nutrition, community nutrition, food service, food safety and quality control

<sup>f</sup> Mean (SD) = Mean standard deviation

**Table 2.** LDs<sup>o</sup> Respondents’ Experience in Providing Telehealth for Nutrition Care Prior to and During COVID-19<sup>p</sup> in Lebanon (N=93)

| <i>Survey Questions</i>                                                                             | <i>N (%)<sup>a</sup></i>     |
|-----------------------------------------------------------------------------------------------------|------------------------------|
| <b>Provided nutrition care via Telehealth prior to Covid-19</b>                                     |                              |
| Yes                                                                                                 | 45 (48.4)                    |
| No                                                                                                  | 48 (51.6)                    |
| <b>Received training on the use of Telehealth prior to Covid-19</b>                                 |                              |
| Yes                                                                                                 | 8 (8.6)                      |
| No                                                                                                  | 85 (91.4)                    |
|                                                                                                     | <b>Mean (SD)<sup>r</sup></b> |
| <b>Years of experience in providing nutrition care via Telehealth prior to Covid-19<sup>s</sup></b> | 1.43 (2.5)                   |
| <b>Hours per week providing face-to-face nutrition care prior to COVID-19 pandemic</b>              | 10.7 (11.5)                  |
|                                                                                                     | <b>N (%)</b>                 |
| <b>Provided nutrition care via Telehealth for patients in Lebanon during Covid-19</b>               |                              |
| Yes                                                                                                 | 91 (97.8)                    |
| No                                                                                                  | 2 (2.2)                      |
| <b>Provided nutrition care via Telehealth for patients outside Lebanon during COVID-19</b>          |                              |
| Yes                                                                                                 | 47 (50.5)                    |
| No                                                                                                  | 28 (30.1)                    |
| <b>Provided nutrition care via Telehealth from Lebanon during COVID-19</b>                          |                              |

|     |           |
|-----|-----------|
| Yes | 92 (98.9) |
| No  | 1 (1.1)   |

---

**Targets of nutrition care via Telehealth during COVID-19**

|                             |           |
|-----------------------------|-----------|
| Individuals                 | 70 (75.3) |
| Both individuals and groups | 23 (24.7) |

**Tools used to perform Telehealth for nutrition care during COVID-19<sup>tu</sup>**

|                                                                       |           |
|-----------------------------------------------------------------------|-----------|
| WhatsApp                                                              | 84 (90.3) |
| Zoom                                                                  | 67 (72.0) |
| E-mails                                                               | 39 (41.9) |
| Telephone (Regular audio-only)                                        | 37 (39.8) |
| Skype                                                                 | 9 (9.7)   |
| Apple Face Time                                                       | 2 (2.2)   |
| Microsoft Teams                                                       | 13 (14.0) |
| Zoom for healthcare                                                   | 3 (3.2)   |
| Electronic Health Record                                              | 3 (3.3)   |
| Doxy.me                                                               | 0 (0)     |
| Cisco WebEx                                                           | 2 (2.2)   |
| Social media application (Instagram, Facebook, Facebook messenger...) | 18 (19.4) |
| Other <sup>v</sup>                                                    | 21 (22.6) |

**Telehealth features used during Covid-19<sup>g</sup>**

|              |           |
|--------------|-----------|
| Voice call   | 63 (67.7) |
| Text message | 53 (57.0) |

---

---

|                                                                   |           |
|-------------------------------------------------------------------|-----------|
| Voice message                                                     | 61 (65.6) |
| Media (photo, video, radiological imaging, laboratory results...) | 44 (47.3) |
| Video calls                                                       | 78 (83.9) |

399

**Types of nutrition assessment<sup>w</sup> and/or monitoring and evaluation<sup>x</sup> conducted via Telehealth during COVID-19<sup>g</sup>**

|                                                                       |           |
|-----------------------------------------------------------------------|-----------|
| Food and nutrition related history                                    | 88 (94.6) |
| Patient history                                                       | 83 (89.2) |
| Knowledge/ beliefs/ attitudes                                         | 67 (72.0) |
| Behavior                                                              | 69 (74.2) |
| Anthropometric measurements                                           | 58 (62.4) |
| Physical activity and function                                        | 71 (76.3) |
| Factors affecting access to food and food/ nutrition related supplies | 51 (54.8) |
| Biochemical data, medical tests, and procedures                       | 65 (69.9) |
| Medication and complementary medicine use                             | 55 (59.1) |
| Food and nutrient administration                                      | 47 (50.5) |
| Other <sup>y</sup>                                                    | 74 (79.6) |

**Types of nutrition interventions<sup>z</sup> provided via Telehealth during COVID-19<sup>g</sup>**

|                                                              |           |
|--------------------------------------------------------------|-----------|
| Nutrition counseling                                         | 84 (90.3) |
| Nutrition education                                          | 82 (88.2) |
| Coordination of nutrition care with healthcare professionals | 26 (28.0) |
| Food and/ or nutrient delivery                               | 20 (21.5) |
| Enteral and parenteral nutrition                             | 6 (6.5)   |

---

400

---

|                                   |         |
|-----------------------------------|---------|
| Population-based nutrition action | 8 (8.6) |
|-----------------------------------|---------|

|                     |           |
|---------------------|-----------|
| Other <sup>aa</sup> | 53 (57.0) |
|---------------------|-----------|

**Patients consulted via Telehealth during Covid-19**

|                           |           |
|---------------------------|-----------|
| Patients you already know | 83 (89.2) |
|---------------------------|-----------|

|                                            |           |
|--------------------------------------------|-----------|
| Patients you already Know and new patients | 66 (71.0) |
|--------------------------------------------|-----------|

|              |           |
|--------------|-----------|
| New patients | 76 (81.7) |
|--------------|-----------|

**Method of communicating results of Telehealth back to referring medical provider during COVID-19<sup>g</sup>**

|                                                                   |           |
|-------------------------------------------------------------------|-----------|
| I documented the interaction through an electronic medical record | 19 (20.4) |
|-------------------------------------------------------------------|-----------|

|                                          |           |
|------------------------------------------|-----------|
| I sent an e-mail to the medical provider | 20 (21.5) |
|------------------------------------------|-----------|

|                                      |         |
|--------------------------------------|---------|
| I sent a fax to the medical provider | 1 (1.1) |
|--------------------------------------|---------|

|                                                                    |           |
|--------------------------------------------------------------------|-----------|
| I used social media applications (WhatsApp, Facebook Messenger...) | 38 (40.9) |
|--------------------------------------------------------------------|-----------|

|                                        |         |
|----------------------------------------|---------|
| I called the medical provider's office | 7 (7.5) |
|----------------------------------------|---------|

|                                      |         |
|--------------------------------------|---------|
| I do not communicate the interaction | 4 (4.3) |
|--------------------------------------|---------|

|                                             |           |
|---------------------------------------------|-----------|
| I do not have any referral medical provider | 33 (35.5) |
|---------------------------------------------|-----------|

|                     |         |
|---------------------|---------|
| Other <sup>bb</sup> | 3 (3.2) |
|---------------------|---------|

**Telehealth used for continuing medical education during COVID-19**

|     |           |
|-----|-----------|
| Yes | 71 (76.3) |
|-----|-----------|

|    |           |
|----|-----------|
| No | 22 (23.7) |
|----|-----------|

**Telehealth sessions' average minutes spent having direct client(s) contact during COVID-19**

|                      |           |
|----------------------|-----------|
| Less than 30 minutes | 16 (17.2) |
|----------------------|-----------|

|                      |           |
|----------------------|-----------|
| 30 minutes           | 29 (31.2) |
| More than 30 minutes | 48 (51.6) |

---

<sup>a</sup> LD = Lebanese Licensed Dietitians

<sup>b</sup> COVID-19 = The SARS-Cov-2 pandemic

<sup>c</sup> Does not include missing responses

<sup>d</sup> Mean (SD) = Mean standard deviation

<sup>e</sup> For respondents who indicated they provided nutrition care via Telehealth prior to the COVID-19 pandemic

<sup>f</sup> For respondents who indicated they provided nutrition care via Telehealth using tools

<sup>g</sup> Respondents were able to select all options that applied

<sup>h</sup> Google Duo, Drapp, Mynutriboxapp, Sohati, Google Meet, Botim

<sup>i</sup> Nutrition assessment, the first step of the nutrition care process, is a systematic approach to collect, classify, and synthesize important and relevant data needed to identify nutrition-related problems and their causes.

<sup>j</sup> Nutrition monitoring and evaluation follows nutrition intervention in the nutrition care process and identifies outcomes/indicators relevant to the diagnosis and nutrition intervention plans and goals.

<sup>k</sup> Other detailed answers not provided by survey participants

<sup>l</sup> A nutrition intervention follows nutrition diagnosis in the nutrition care process and is a purposefully planned action(s) designed with the intent of changing a nutrition-related behavior, risk factor, environmental condition, or aspect of health status to resolve or improve the identified nutrition diagnosis(es) or nutrition problem(s).

<sup>m</sup> Other detailed answers not provided by survey participants

<sup>n</sup> Other detailed answers not provided by survey participants

**Table 3.** LDs<sup>a</sup> Reported Barriers, Facilitators and Benefits of Telehealth Use during COVID-19<sup>b</sup> in Lebanon (N=93)

| <b>Telehealth Barriers, Facilitators and Benefits during COVID-19<sup>b</sup></b>     | <b>Responses<sup>c</sup></b> |
|---------------------------------------------------------------------------------------|------------------------------|
| <b>Barriers experienced by delivering nutrition care via Telehealth<sup>d</sup></b>   | <b>N (%)</b>                 |
| Providers not having an internet access                                               | 22 (23.7)                    |
| Bad connection during sessions                                                        | 69 (74.2)                    |
| Discomfort delivering nutrition care via Telehealth                                   | 14 (15.1)                    |
| Not being able to conduct or evaluate nutrition assessment, monitoring and evaluation | 30 (32.3)                    |
| Not being able to deliver some routine nutrition interventions via Telehealth         | 15 (16.1)                    |
| Not having remote access to the electronic health record at my home                   | 13 (14.0)                    |
| Not having appropriate equipment to deliver Telehealth                                | 24 (25.8)                    |
| Difficulty with establishing relationships/therapeutic alliance via Telehealth        | 14 (15.1)                    |
| Lack of patient referrals from medical providers                                      | 22 (23.7)                    |
| Lack of employer support                                                              | 2 (2.2)                      |
| Patients not interested in having any nutrition services via Telehealth               | 23 (24.7)                    |
| Patients not interested in having any nutrition services at time of COVID-19          | 15 (16.1)                    |
| Patients preferred face-to-face consultations                                         | 57 (61.3)                    |
| Patients not having internet access                                                   | 36 (38.7)                    |
| Patients not having landline phones or cellphones                                     | 4 (4.3)                      |
| Patients not cooperant during Telehealth consultations                                | 17 (18.3)                    |
| Patients lack in technical literacy                                                   | 31 (33.3)                    |
| Concerns about privacy and confidentiality                                            | 8 (8.6)                      |



Others<sup>e</sup> 49 (52.7)

**Telehealth facilitators experienced by delivering nutrition care via Telehealth<sup>d</sup>**

COVID-19 created an atmosphere of technology acceptance and penetration 65 (69.9)

Past experience with Telehealth nutrition care 11 (11.8)

Ease of use 53 (57.0)

Increased communication with patient 39 (41.9)

Increased communication with other health professionals 28 (30.1)

Others<sup>f</sup> 24 (25.8)

**Benefits experienced by delivering nutrition care via Telehealth<sup>d</sup>**

Promoting compliance with social distancing measures of COVID-19 50 (53.8)

Scheduling and time flexibility 78 (83.9)

Decrease costs related to practice (rent, transportation, equipment, stationary...) 72 (77.4)

---

<sup>a</sup> LDs = Lebanese Licensed Dietitians

<sup>b</sup> COVID-19 = The SARS-Cov-2 pandemic

<sup>c</sup> Does not include missing responses

<sup>d</sup> Respondents were able to select all options that applied

<sup>e</sup> Other detailed answers not provided by survey participants

<sup>f</sup> Other detailed answers not provided by survey participants

## Figures

**Figure 1:** Tools Used by LDs<sup>a</sup> to Provide Telehealth Nutrition Care During the Pandemic (%)

(N=93)<sup>b</sup>

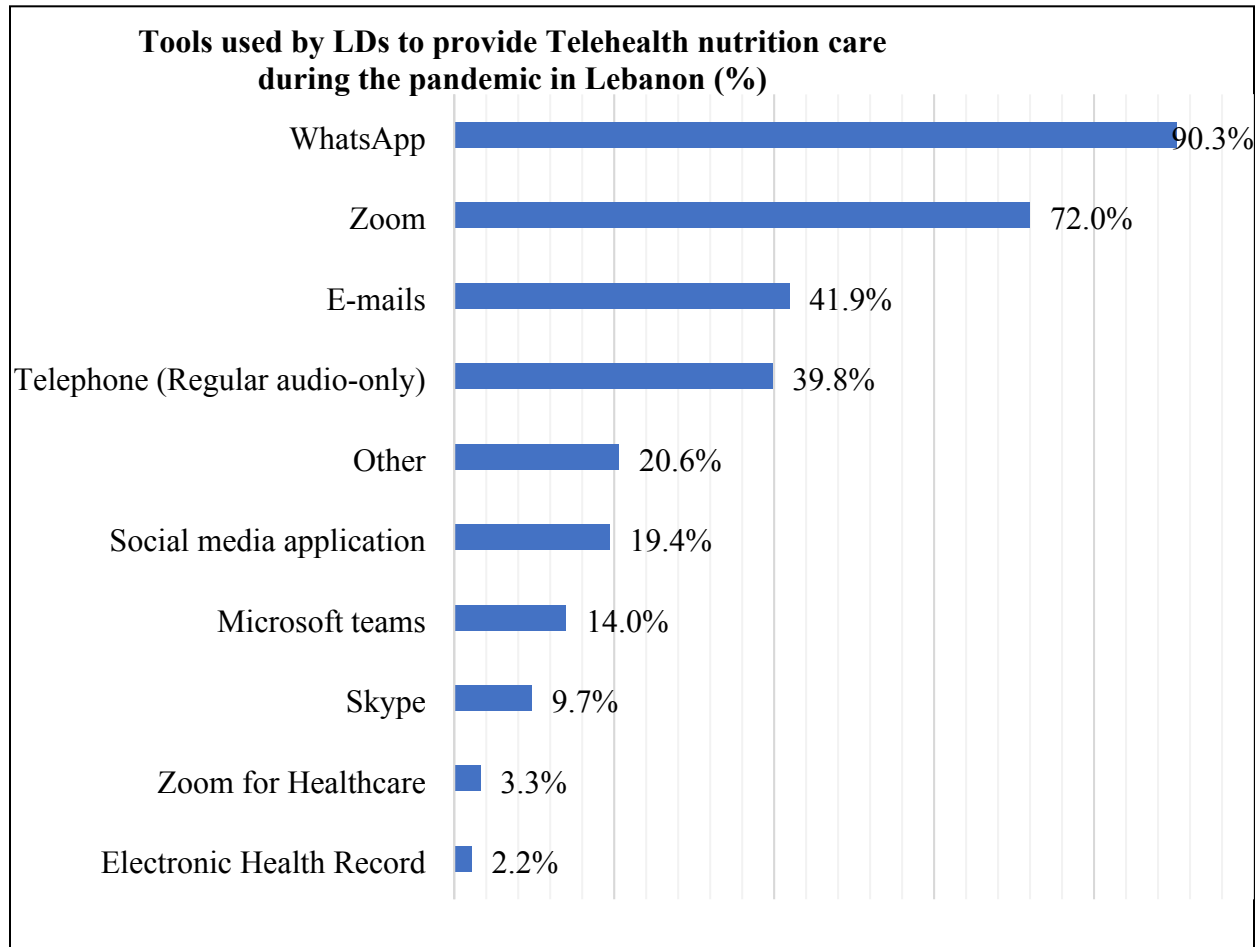

<sup>a</sup> LDs = Lebanese Licensed Dietitians

<sup>b</sup> Respondents were able to select all options that applied

**Figure 2:** Perspective of LDs<sup>a</sup> on Telehealth Use for Nutrition Care during The Pandemic

(N=93)<sup>b</sup>

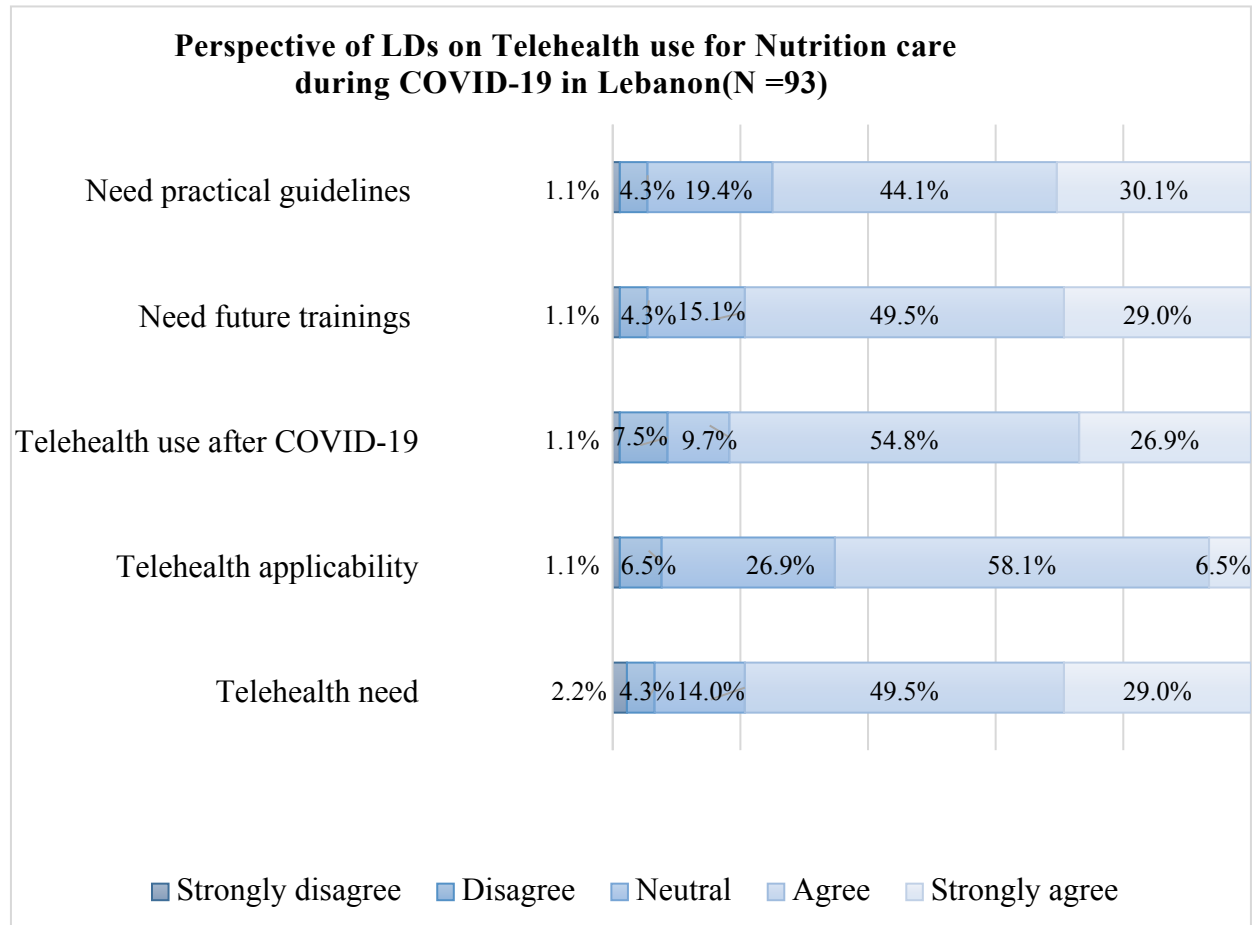

<sup>a</sup> LDs = Lebanese Licensed Dietitians

<sup>b</sup> Include missing responses

<sup>a</sup> LD = Lebanese Licensed Dietitians

<sup>b</sup> COVID-19 = The SARS-Cov-2 pandemic

<sup>c</sup> Does not include missing responses

<sup>d</sup> Mean (SD) = Mean standard deviation

<sup>e</sup> For respondents who indicated they provided nutrition care via Telehealth prior to the COVID-19 pandemic

---

<sup>f</sup> For respondents who indicated they provided nutrition care via Telehealth using tools

<sup>g</sup> Respondents were able to select all options that applied

<sup>h</sup> Google Duo, Drapp, Mynutriboxapp, Sohati, Google Meet, Botim

<sup>i</sup> Nutrition assessment, the first step of the nutrition care process, is a systematic approach to collect, classify, and synthesize important and relevant data needed to identify nutrition-related problems and their causes.

<sup>j</sup> Nutrition monitoring and evaluation follows nutrition intervention in the nutrition care process and identifies outcomes/indicators relevant to the diagnosis and nutrition intervention plans and goals.

<sup>k</sup> Other detailed answers not provided by survey participants

<sup>l</sup> A nutrition intervention follows nutrition diagnosis in the nutrition care process and is a purposefully planned action(s) designed with the intent of changing a nutrition-related behavior, risk factor, environmental condition, or aspect of health status to resolve or improve the identified nutrition diagnosis(es) or nutrition problem(s).

<sup>m</sup> Other detailed answers not provided by survey participants

<sup>n</sup> Other detailed answers not provided by survey participants



**Figure 1: Tools Used by LDs<sup>a</sup> to Provide Telehealth Nutrition Care During the Pandemic (%)**

(N=93)<sup>b</sup>

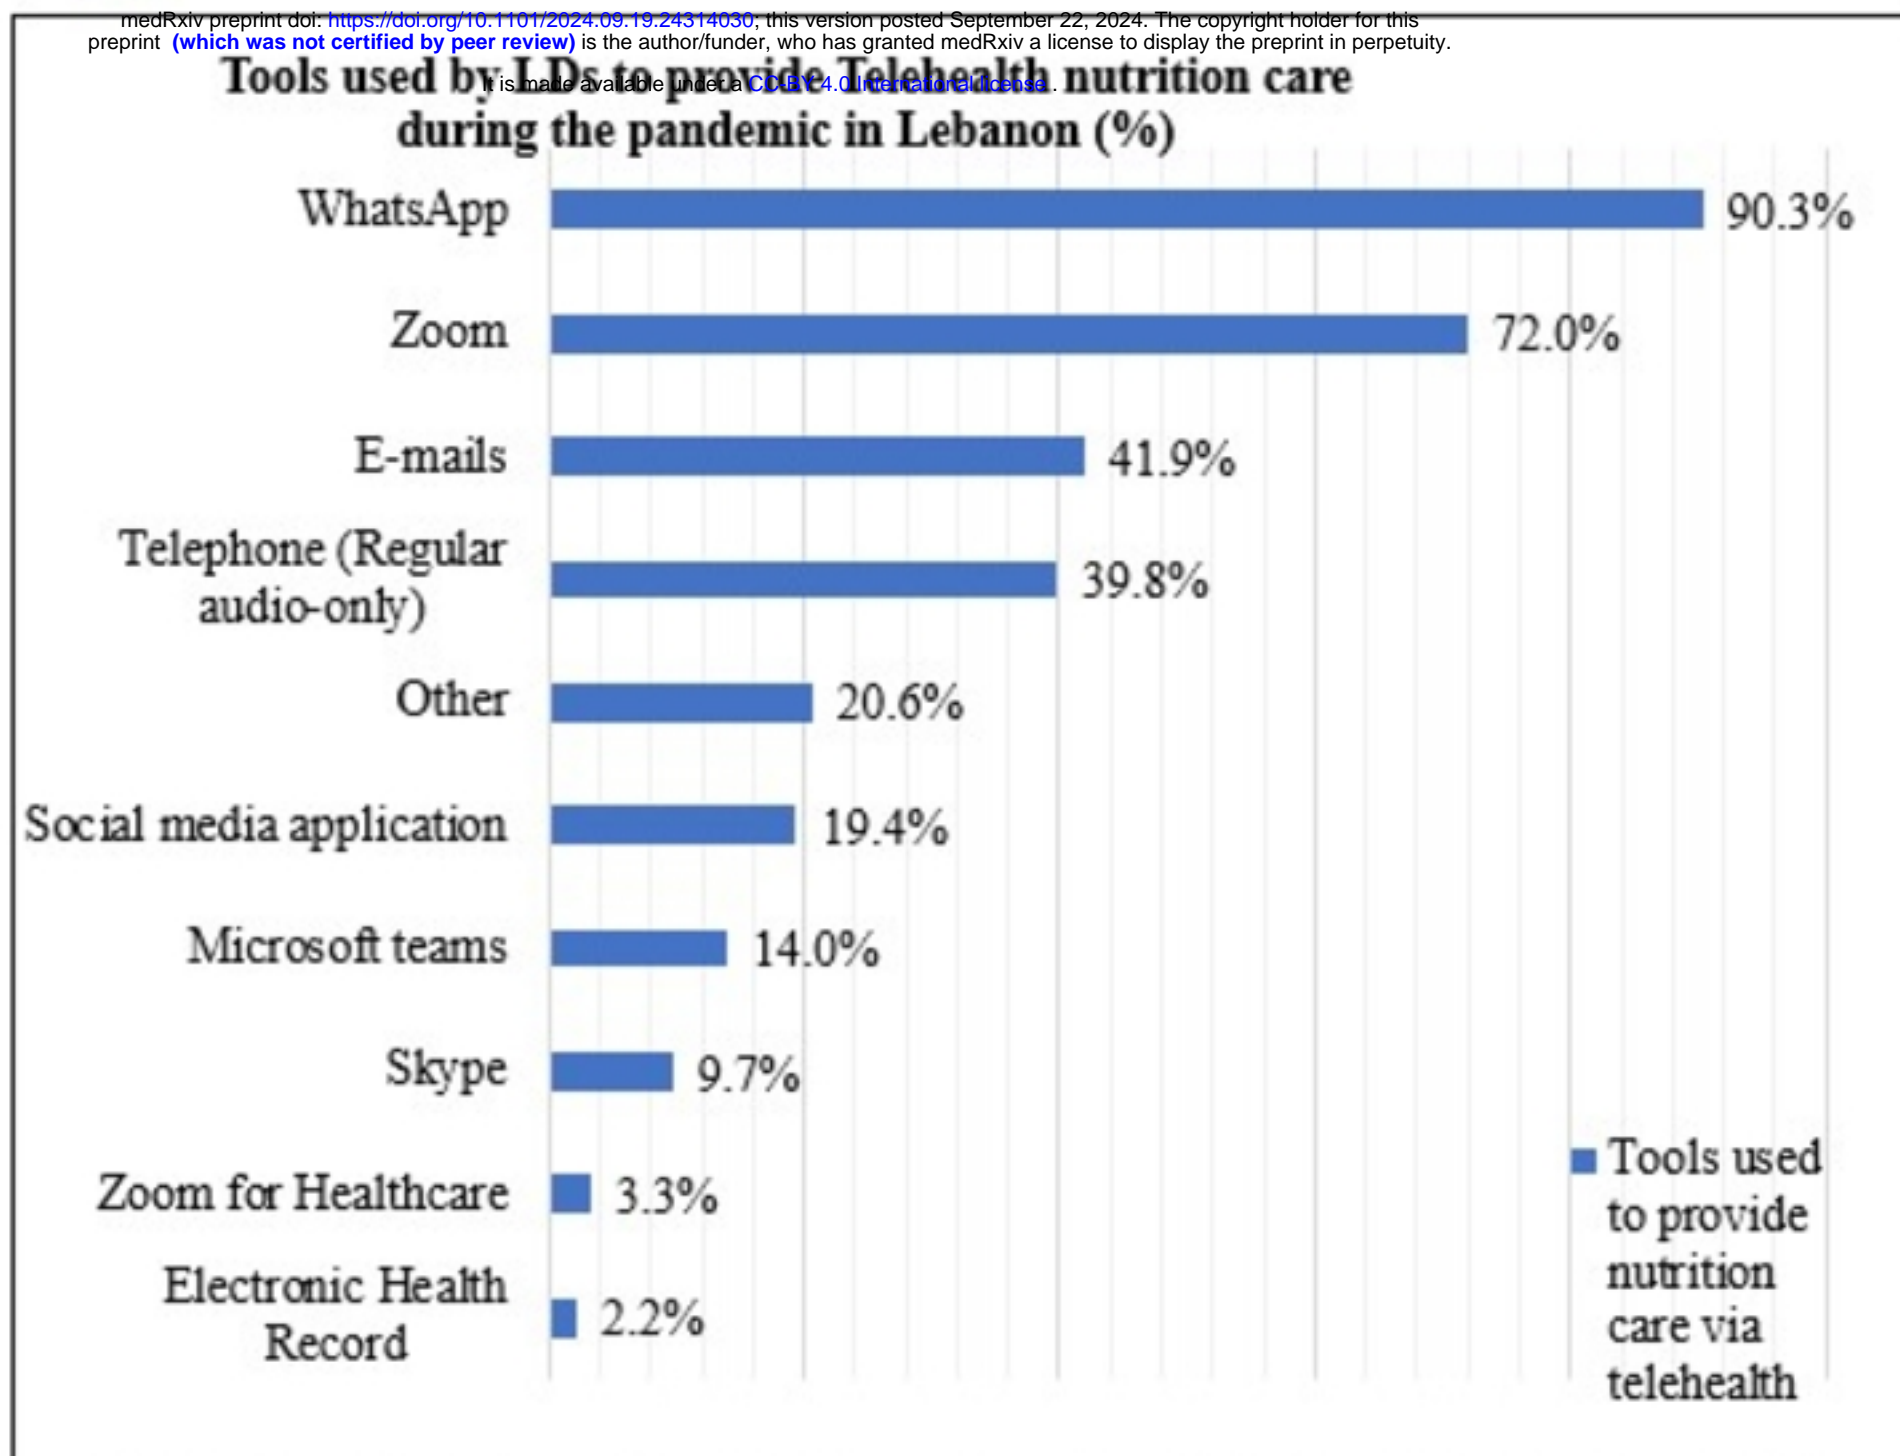

This figure shows the tools used by LDs to perform Telehealth for nutrition care during the pandemic. As reported, 90.3% of LDs used WhatsApp as their main tool, followed by Zoom applications, emails and Telephone. However, Zoom for Healthcare and the Electronic Health Record were barely used.

<sup>a</sup> LDs = Lebanese Licensed Dietitians

<sup>b</sup> Respondents were able to select all options that applied

**Figure 2: Perspective of LDs<sup>a</sup> on Telehealth Use for Nutrition Care during The Pandemic**

(N=93)<sup>b</sup>

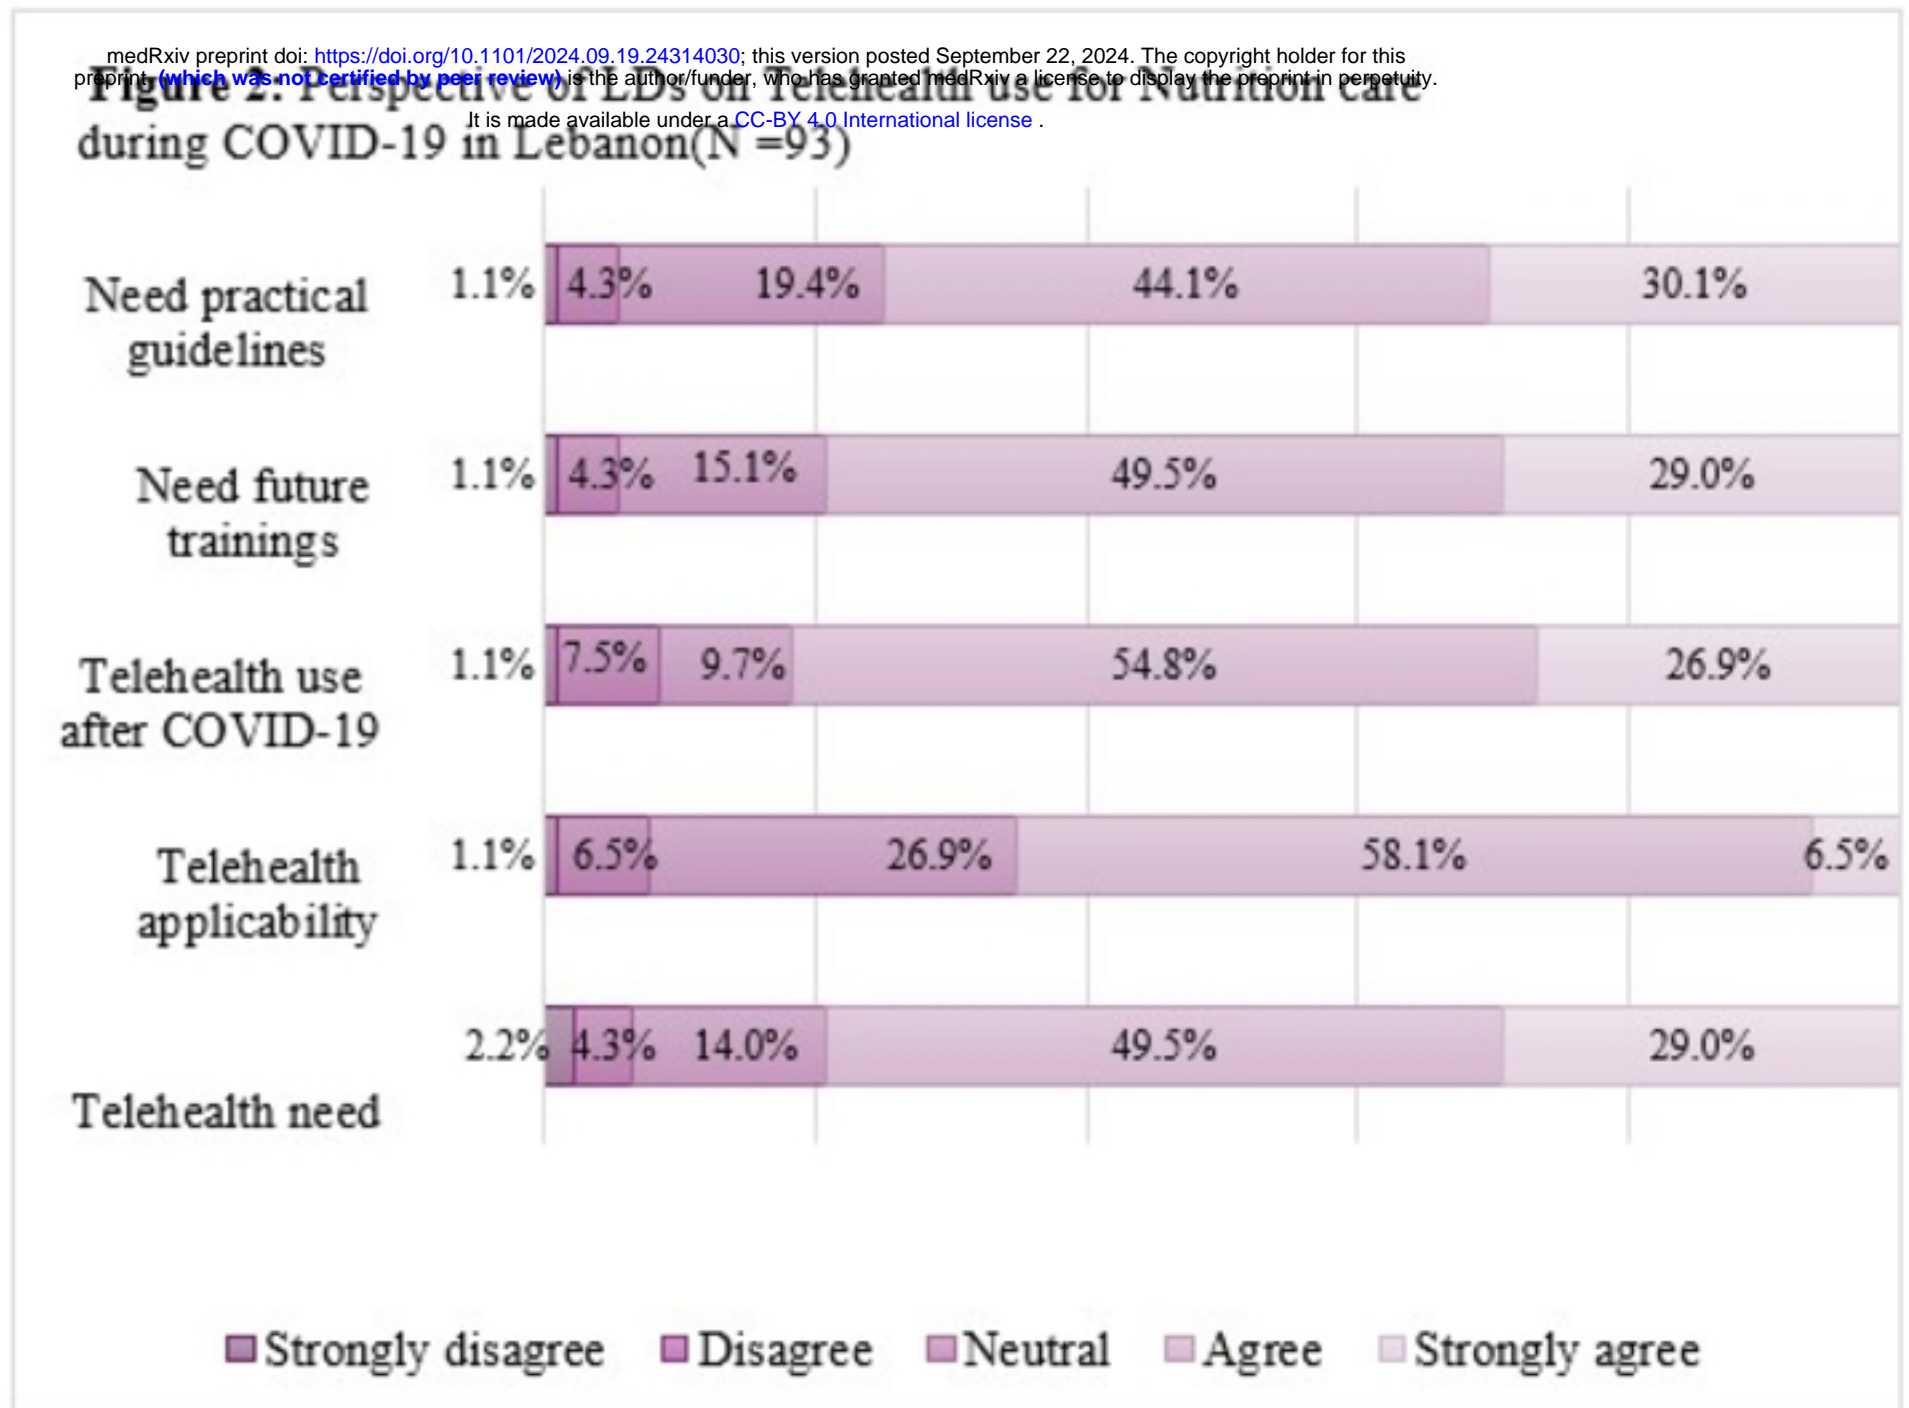

This figure illustrates the perspectives of Lebanese Licensed Dietitians (LDs) on telehealth use for nutrition care during the COVID-19 pandemic in Lebanon. Using the Likert Scale (Strongly disagree, Disagree, Neutral, Agree, and Strongly agree), LDs responded on their need for practical guidelines, their need for future trainings, their willingness to use Telehealth post-pandemic in addition to their perspectives on Telehealth need and Telehealth applicability in the Lebanese context. LDs responses are presented by percentage.

<sup>a</sup> LDs = Lebanese Licensed Dietitians

<sup>b</sup> Include missing responses
